# Supplementary material for: GLUT1 Regulates the Tumor Immune Microenvironment and Promotes Tumor Metastasis in Pancreatic Adenocarcinoma via ncRNA-mediated Network
Source: PubMed Central journal article supplement (PMC9174867; doi:10.7150/jca.72161), 2022-05-13
Supplement: jcav13p2540s1.pdf [file jcav13p2540s1.pdf]

## Supplementary tables

**Table S1.** The top 50 significantly differentially expressed genes that were upregulated synchronously with GLUT1.

| Gene     | Statistic | P-value  | FDR      |
|----------|-----------|----------|----------|
| SLC2A1   | 1         | 1.00E-33 | 1.00E-29 |
| EPHA2    | 0.748131  | 3.57E-33 | 3.53E-29 |
| CDCP1    | 0.745665  | 7.45E-33 | 3.72E-29 |
| CDH3     | 0.745635  | 7.52E-33 | 3.72E-29 |
| AIM1L    | 0.722083  | 5.69E-30 | 2.25E-26 |
| ITGA3    | 0.718694  | 1.40E-29 | 4.60E-26 |
| ACTN4    | 0.716867  | 2.25E-29 | 6.36E-26 |
| ADM      | 0.716266  | 2.64E-29 | 6.51E-26 |
| SEMA4B   | 0.715105  | 3.56E-29 | 7.83E-26 |
| TMEM189  | 0.708851  | 1.76E-28 | 3.48E-25 |
| SLC16A3  | 0.702936  | 7.68E-28 | 1.38E-24 |
| LDHA     | 0.698923  | 2.04E-27 | 3.37E-24 |
| COX6B2   | 0.695268  | 4.92E-27 | 7.48E-24 |
| PLEC     | 0.691571  | 1.18E-26 | 1.66E-23 |
| MALL     | 0.691223  | 1.28E-26 | 1.69E-23 |
| TINAGL1  | 0.689543  | 1.89E-26 | 2.34E-23 |
| ALDOA    | 0.686201  | 4.10E-26 | 4.77E-23 |
| TFAP2A   | 0.684101  | 6.63E-26 | 7.28E-23 |
| FAM83A   | 0.682942  | 8.62E-26 | 8.85E-23 |
| PPARG    | 0.682407  | 9.73E-26 | 9.17E-23 |
| SERPINB5 | 0.680214  | 1.60E-25 | 1.43E-22 |
| PPP1R3G  | 0.679081  | 2.06E-25 | 1.77E-22 |
| ASAP2    | 0.678352  | 2.42E-25 | 1.99E-22 |
| HK2      | 0.676864  | 3.36E-25 | 2.66E-22 |
| SDC4     | 0.673254  | 7.44E-25 | 5.66E-22 |
| S100A10  | 0.671482  | 1.09E-24 | 8.01E-22 |
| ERO1L    | 0.670838  | 1.26E-24 | 8.88E-22 |
| LRRC8A   | 0.670577  | 1.33E-24 | 9.07E-22 |
| SCEL     | 0.668295  | 2.17E-24 | 1.43E-21 |
| LAMC2    | 0.667811  | 2.41E-24 | 1.52E-21 |
| BHLHE40  | 0.667689  | 2.47E-24 | 1.52E-21 |
| PLEKHN1  | 0.66758   | 2.53E-24 | 1.52E-21 |
| GNA15    | 0.665326  | 4.08E-24 | 2.38E-21 |
| JUP      | 0.663902  | 5.52E-24 | 3.12E-21 |
| FLNB     | 0.659368  | 1.42E-23 | 7.80E-21 |
| PCDH1    | 0.658728  | 1.62E-23 | 8.66E-21 |
| MBOAT2   | 0.654831  | 3.60E-23 | 1.83E-20 |

|              |          |          |          |
|--------------|----------|----------|----------|
| FOXL1        | 0.654082 | 4.19E-23 | 2.07E-20 |
| PLEK2        | 0.651752 | 6.71E-23 | 3.23E-20 |
| C8orf73      | 0.650162 | 9.22E-23 | 4.34E-20 |
| SERINC2      | 0.649799 | 9.92E-23 | 4.46E-20 |
| GJB3         | 0.649326 | 1.09E-22 | 4.79E-20 |
| PKM2         | 0.645458 | 2.34E-22 | 9.45E-20 |
| ELOVL1       | 0.644548 | 2.80E-22 | 1.11E-19 |
| RHOC         | 0.644118 | 3.04E-22 | 1.18E-19 |
| INPP4B       | 0.64346  | 3.46E-22 | 1.32E-19 |
| LAMB3        | 0.642017 | 4.58E-22 | 1.71E-19 |
| LOC100131726 | 0.640185 | 6.52E-22 | 2.39E-19 |
| MET          | 0.639549 | 7.37E-22 | 2.60E-19 |
| CGB7         | 0.638732 | 8.62E-22 | 2.99E-19 |

**Table S2.** The top 50 significantly differentially expressed genes that were downregulated synchronously with GLUT1.

| Gene      | Statistic | P-value  | FDR      |
|-----------|-----------|----------|----------|
| FBXO9     | -0.68278  | 8.95E-26 | 8.85E-23 |
| ELAC1     | -0.65768  | 2.01E-23 | 1.05E-20 |
| RWDD2A    | -0.64992  | 9.67E-23 | 4.45E-20 |
| ZFP3      | -0.64916  | 1.13E-22 | 4.84E-20 |
| SESN1     | -0.64631  | 1.98E-22 | 8.32E-20 |
| RABEP1    | -0.64592  | 2.14E-22 | 8.81E-20 |
| ACACB     | -0.64006  | 6.68E-22 | 2.40E-19 |
| GSTA4     | -0.6367   | 1.27E-21 | 4.19E-19 |
| TTLL11    | -0.6329   | 2.60E-21 | 7.79E-19 |
| EPM2A     | -0.63182  | 3.18E-21 | 9.26E-19 |
| HDHD2     | -0.63173  | 3.24E-21 | 9.27E-19 |
| LYRM2     | -0.6296   | 4.81E-21 | 1.32E-18 |
| ACSL6     | -0.62717  | 7.52E-21 | 1.98E-18 |
| ACAT1     | -0.62551  | 1.02E-20 | 2.47E-18 |
| ZNF181    | -0.62548  | 1.02E-20 | 2.47E-18 |
| ZNF596    | -0.62408  | 1.32E-20 | 3.11E-18 |
| EPHX2     | -0.62373  | 1.41E-20 | 3.28E-18 |
| SEC11C    | -0.62251  | 1.76E-20 | 3.95E-18 |
| B3GNT1    | -0.62166  | 2.05E-20 | 4.36E-18 |
| GKAP1     | -0.61769  | 4.16E-20 | 8.07E-18 |
| MOCS2     | -0.61698  | 4.72E-20 | 8.97E-18 |
| EML5      | -0.61128  | 1.28E-19 | 2.18E-17 |
| C22orf39  | -0.60956  | 1.72E-19 | 2.89E-17 |
| NCOA5     | -0.60813  | 2.21E-19 | 3.58E-17 |
| LOC400657 | -0.60787  | 2.30E-19 | 3.68E-17 |

|           |          |          |          |
|-----------|----------|----------|----------|
| CYB5D2    | -0.60722 | 2.58E-19 | 4.04E-17 |
| SRR       | -0.60468 | 3.97E-19 | 6.04E-17 |
| FAM184A   | -0.59768 | 1.28E-18 | 1.76E-16 |
| RUNDC3B   | -0.59735 | 1.35E-18 | 1.83E-16 |
| ZNF491    | -0.5972  | 1.38E-18 | 1.86E-16 |
| C20orf132 | -0.59468 | 2.10E-18 | 2.69E-16 |
| C9orf130  | -0.5938  | 2.42E-18 | 3.05E-16 |
| ZNF658    | -0.59332 | 2.62E-18 | 3.24E-16 |
| PARK2     | -0.59201 | 3.24E-18 | 3.84E-16 |
| TATDN3    | -0.59116 | 3.71E-18 | 4.34E-16 |
| RFXAP     | -0.58905 | 5.22E-18 | 5.96E-16 |
| METTL7A   | -0.58626 | 8.15E-18 | 8.85E-16 |
| ZNF271    | -0.58607 | 8.39E-18 | 9.07E-16 |
| PDCD4     | -0.58575 | 8.83E-18 | 9.48E-16 |
| ASB8      | -0.58515 | 9.71E-18 | 1.03E-15 |
| ATP5A1    | -0.58483 | 1.02E-17 | 1.07E-15 |
| SOCS2     | -0.58353 | 1.25E-17 | 1.29E-15 |
| JMJD5     | -0.583   | 1.36E-17 | 1.38E-15 |
| C6orf89   | -0.57957 | 2.33E-17 | 2.24E-15 |
| SCML2     | -0.57904 | 2.53E-17 | 2.39E-15 |
| C20orf160 | -0.57823 | 2.87E-17 | 2.67E-15 |
| TCEAL1    | -0.57811 | 2.92E-17 | 2.71E-15 |
| TSPAN7    | -0.57808 | 2.93E-17 | 2.71E-15 |
| SNTG2     | -0.57753 | 3.19E-17 | 2.91E-15 |
| PLK1S1    | -0.57741 | 3.25E-17 | 2.95E-15 |

---
